1 **Unexpected sounds non-selectively inhibit active visual stimulus**  
2 **representations**

3 Running title: Inhibition of attention by unexpected events

4

5 **Cheol Soh<sup>1</sup> and Jan R. Wessel<sup>1,2</sup>**

6 <sup>1</sup>Department of Psychological and Brain Sciences, University of Iowa, Iowa City, Iowa 52245

7 <sup>2</sup>Department of Neurology, University of Iowa Hospitals and Clinics, Iowa City, Iowa 52242

8

9 *Corresponding author address*

10 Jan R. Wessel, Ph.D.

11 University of Iowa

12 376 Psychological and Brain Sciences Building

13 340 Iowa Avenue

14 Iowa City, IA 52240

15 Jan-wessel@uiowa.edu

16 www.wessellab.org

17

18 **Abstract**

19 The brain's capacity to process unexpected events is key to cognitive flexibility. The most well-  
20 known effect of unexpected events is the interruption of attentional engagement (distraction). We  
21 tested whether unexpected events interrupt attentional representations by activating a neural  
22 mechanism for inhibitory control. This mechanism is most well-characterized within the motor  
23 system. However, recent work showed that it is automatically activated by unexpected events and  
24 can explain some of their non-motor effects (e.g., on working memory representations). Here,  
25 human participants attended to lateralized flickering visual stimuli, producing steady-state visual  
26 evoked potentials (SSVEP) in the scalp-electroencephalogram. After unexpected sounds, the  
27 SSVEP was rapidly suppressed. Using a functional localizer (stop-signal) task and independent  
28 component analysis, we then identified a fronto-central EEG source whose activity indexes  
29 inhibitory motor control. Unexpected sounds in the SSVEP task also activated this source. Using  
30 single-trial analyses, we found that sub-components of this source differentially relate to sound-  
31 related SSVEP changes: while its N2 component predicted the subsequent suppression of the  
32 attended-stimulus SSVEP, the P3 component predicted the suppression of the SSVEP to the  
33 unattended stimulus. These results shed new light on the processes underlying fronto-central  
34 control signals and have implications for phenomena such as distraction and the attentional blink.

35

36 **Keywords:** Attention, Distraction, Inhibitory Control, Steady-state visual evoked potential, Stop-  
37 signal task

38

39           Unexpected perceptual events, such as sudden sounds, are known to disrupt ongoing  
40 thoughts and actions. For example, when a warehouse worker hears an unexpected glass-shattering  
41 sound while doing inventory, they may momentarily stop writing on a count sheet and indeed  
42 forget their count altogether. This type of stimulus-driven distraction produced by unexpected  
43 perceptual events is of key interest to researchers studying attentional capture and its control  
44 (Yantis, 1993; Simons, 2000; Corbetta et al., 2008; Awh et al., 2012). Cognitive psychology has  
45 generated substantial insights into how distractors affect attentional engagement with the same  
46 sensory domain (Bacon & Egeth, 1994; Theeuwes, 2004; Gaspelin et al., 2017; Liesefeld et al.,  
47 2017). Moreover, cognitive neuroscience has provided a comprehensive picture of neural activity  
48 after unexpected events (Courchesne et al., 1975; Corbetta & Shulman, 2002). However, relatively  
49 little is known about the exact neural mechanisms by which task-irrelevant unexpected events  
50 disrupt active, task-relevant attentional representations, especially across sensory domains. In a  
51 recent theoretical article, we proposed that unexpected sensory events engage an inhibitory brain  
52 mechanism that is capable of interrupting active neural representations that support active motor  
53 and non-motor (i.e., cognitive) functions (Wessel & Aron, 2017). At the core of this proposal is  
54 the assertion that a well-characterized neural mechanism for inhibitory control (which is well-  
55 known to be involved in suppressing active motor representations, and which is automatically  
56 triggered by unexpected events; Wessel & Aron, 2013; Wessel, 2018), can exert inhibitory  
57 influence even on non-motor representations, such as working memory or attention (Chiu & Egner,  
58 2014, 2015; Wessel et al., 2016; Castiglione et al., 2019; Tempel et al., 2020).

59           The brain network in question implements its inhibitory function via a fronto-basal-ganglia  
60 (FBg) network that involves the pre-supplementary motor area (preSMA), the right inferior frontal  
61 cortex (rIFC), and the subthalamic nucleus (STN) of the basal ganglia (Nachev et al., 2007;

62 Ridderinkhof et al., 2011; Schall & Godlove, 2012; Aron et al., 2014; Jahanshahi et al., 2015). Its  
63 inhibitory influence on movement is most well-studied in the stop-signal task (SST, Logan et al.,  
64 1984), where it implements the ‘stop’-component of the purported race between going and  
65 stopping (Aron et al., 2014). The temporal dynamics of this network can be non-invasively  
66 measured using scalp-electroencephalography (EEG), where its activity is indexed by a  
67 pronounced stop-signal induced fronto-central N2/P3 event-related potential (ERP) complex (de  
68 Jong et al., 1990; Kok et al., 2004; Huster et al., 2013; Wessel & Aron, 2015). The N2 component  
69 of this ERP complex has been proposed to reflect the detection of the stop-signal or the associated  
70 conflict (Schröger, 1993; Donkers & van Boxtel, 2004; Azizian et al., 2006; Enriquez-Geppert et  
71 al., 2010; Smith et al., 2010), whereas the P3 has been hypothesized to reflect the subsequently  
72 implemented inhibitory process (de Jong et al., 1990; Kok et al., 2004; Enriquez-Geppert et al.,  
73 2010; Wessel & Aron, 2015).

74 Our past work has shown that unexpected perceptual events automatically engage this same  
75 inhibitory mechanism (Wessel et al., 2012; Wessel & Aron, 2013, 2017), even when there is no  
76 explicit instruction to engage inhibitory control (Wessel, 2018a). Amongst other findings, this  
77 assertion is supported by the fact that unexpected events lead to a slowing of motor responses  
78 (Dawson et al., 1982; Parmentier et al., 2008) and elicit a fronto-central N2/P3 ERP complex that  
79 is morphologically similar to the fronto-central ERP complex elicited by stop-signals (Courchesne  
80 et al., 1975; Squires et al., 1975). Indeed, independent component analysis (ICA) of EEG data  
81 recorded in subjects that performed both the stop-signal task and tasks involving unexpected events  
82 suggests that both ERP complexes share a common underlying neural generator (Wessel & Aron,  
83 2013; Wessel & Huber, 2019). Moreover, local field potential recordings from the human  
84 subthalamic nucleus (the key subcortical node of the inhibitory FBg-network) suggest that

85 unexpected events engage this subcortical structure as well (Bočková et al., 2011; Wessel et al.,  
86 2016). In line with this, optogenetic inactivation of the STN negates the inhibitory influence that  
87 unexpected sounds have on behavior in mice. While unexpected sounds typically lead to a  
88 premature interruption of ongoing licking bouts, this effect is absent if the STN is inactivated,  
89 providing key causal evidence for the role of inhibitory control structures in surprise processing  
90 (Fife et al., 2017).

91 An important property of this inhibitory FBg mechanism is that it implements inhibition in  
92 non-selective, ‘global’ fashion, both after stop-signals and unexpected sensory events. This is most  
93 evident from experiments that use transcranial magnetic stimulation and electromyography to  
94 measure cortico-spinal excitability (for reviews, see Duque et al., 2017; Wessel & Aron, 2017;  
95 Derosiere et al., 2020). Such experiments show that the rapid reduction of cortico-spinal  
96 excitability that is found after stop-signals (Coxon et al., 2006; Stinear et al., 2009) extends even  
97 to task-unrelated motor effectors (Badry et al., 2009; Greenhouse et al., 2011; Cai et al., 2012;  
98 Goode et al., 2019). The same non-selective suppression of cortico-spinal excitability can be  
99 observed after unexpected events (Wessel & Aron, 2013; Dutra et al., 2018; see also: Novembre  
100 et al., 2018; Novembre et al., 2019). As mentioned above, we have proposed that this type of non-  
101 selective, ‘global’ suppression exerted by the inhibitory mechanism could explain why unexpected  
102 events have effects even on non-motor, cognitive representations (Wessel & Aron, 2017) –  
103 conceivably, if fronto-basal ganglia mediated inhibition is broad and non-selective enough, it may  
104 even affect non-motor representations (provided neural underpinnings of those representations are  
105 susceptible to this inhibitory circuit).

106 Indeed, some preliminary evidence for this proposal already exists. In a first series of  
107 studies, Chiu & Egner (2014) have found that pairing faces with the requirement to rapidly

108 withhold a prepotent action – thereby triggering the inhibitory control network – inhibits the  
109 encoding of these face stimuli into memory. In a follow-up study, the strength of this effect related  
110 directly to the activation of the inhibitory FBg-network (Chiu & Egner, 2015). Further in line with  
111 this, both action-stopping in the stop-signal task and active suppression of memory contents (e.g.,  
112 in the Think/NoThink paradigm, Anderson & Green, 2001) are accompanied by activity from the  
113 same neural source (Castiglione et al., 2019). Finally, in line with the finding that unexpected  
114 events engage the inhibitory network, we have found that the activity of the inhibitory FBg-  
115 network also mediates the disruptive effects of unexpected sounds on active verbal working  
116 memory representations (Wessel et al., 2016).

117 While these studies lend first preliminary support to the general idea that the FBg-network  
118 underlying motor inhibition could also explain the suppression of non-motor representations, all  
119 existing work so far is limited to mnemonic processes. Moreover, it has already been found that  
120 not all types of memory representations seem to be subject to the purported inhibitory influence of  
121 the FBg network (indeed, short-term visual memory representations as operationalized in the  
122 classic work of Vogel & Machizawa, 2004; Vogel et al., 2005, seem to be interrupted by other  
123 mechanisms, cf., Wessel, 2018a). Therefore, it is hitherto unclear which exact types of non-motor  
124 representations are potentially subject to interruption by inhibitory control exerted from the FBg-  
125 network, and whether its influence extends beyond the realm of mnemonic representations.

126 In the current study, we tested whether the activity of this mechanism could explain the  
127 effects of unexpected events on ongoing attentional representations. A highly influential body of  
128 past behavioral work indicates that indeed, attentional regulation may include inhibitory processes  
129 (Shapiro & Raymond, 1994; Klein & Taylor, 1994; Tipper et al., 1990). To test whether attentional  
130 representations are affected by inhibitory control signals after unexpected events, a novel task was

131 designed in which participants attended to one of two concurrently presented rhythmic flickers.  
132 Such flickering visual stimuli are known to produce a steady-state visual evoked potential (SSVEP)  
133 – a stimulus-driven entrainment of parieto-occipital EEG activity to the frequency of the rhythmic  
134 sensory stimulation (Regan, 1989; Silberstein et al., 1995). Notably, the covert direction of  
135 attention towards a specific stimulus leads to an increase in the amplitude of the associated SSVEP  
136 (Morgan et al., 1996; Müller et al., 1998; Ding et al., 2006; Walter et al., 2012). In our task, we  
137 then presented unexpected sounds on a subset of trials while subjects were attending one of the  
138 flickering visual stimuli. We expected the unexpected sounds to rapidly and transiently reduce the  
139 amplitude of the SSVEP, reflecting an interruption of attentional engagement. In addition to this  
140 task, all participants also performed a stop-signal task, which served as a functional localizer for  
141 the FBg-network underlying inhibitory motor control. To test the hypothesis that this same neural  
142 mechanism is related to the interruption of attentional representations after unexpected events, we  
143 used ICA to identify the neural source signal underlying the N2/P3-complex in the stop-signal task  
144 and tested whether this source was also active following unexpected events (as found in prior work,  
145 cf. Wessel & Aron, 2013; Wessel & Huber, 2019). Finally, we then tested whether the activity of  
146 that EEG source related to the disruption of attention (i.e., the SSVEP) on a trial-to-trial basis.

147

## 148 **Materials and Methods**

### 149 *Participants*

150 In Experiment 1, 21 healthy adult college students (mean age: 19.05 years; SD: 1.12; three left-  
151 handed; 14 females) participated the experiment for course credit. In Experiment 2, 21 healthy  
152 adult college students (mean age: 20.52; SD: 2.14; one-left-handed; 11 females) participated. Six  
153 of those participants received course credit and the rest were compensated with \$15 per hour. All

154 participants had normal or corrected-to-normal vision. None of participants performed both  
155 experiments.

156

157 ***Stimulus presentation***

158 All stimuli were presented on a BenQ XL2420B 120Hz gaming monitor with 1ms response time,  
159 connected to an IBM compatible PC running Fedora Linux and MATLAB 2015b. Stimuli were  
160 presented using Psychtoolbox 3 (Brainard, 1997) at the monitor's native resolution of 1920 x 1080  
161 pixels. Responses were made using a standard QWERTY USB keyboard. Viewing distance was  
162 kept constant at 90 cm.

163



## A) Cross-modal SSVEP oddball task

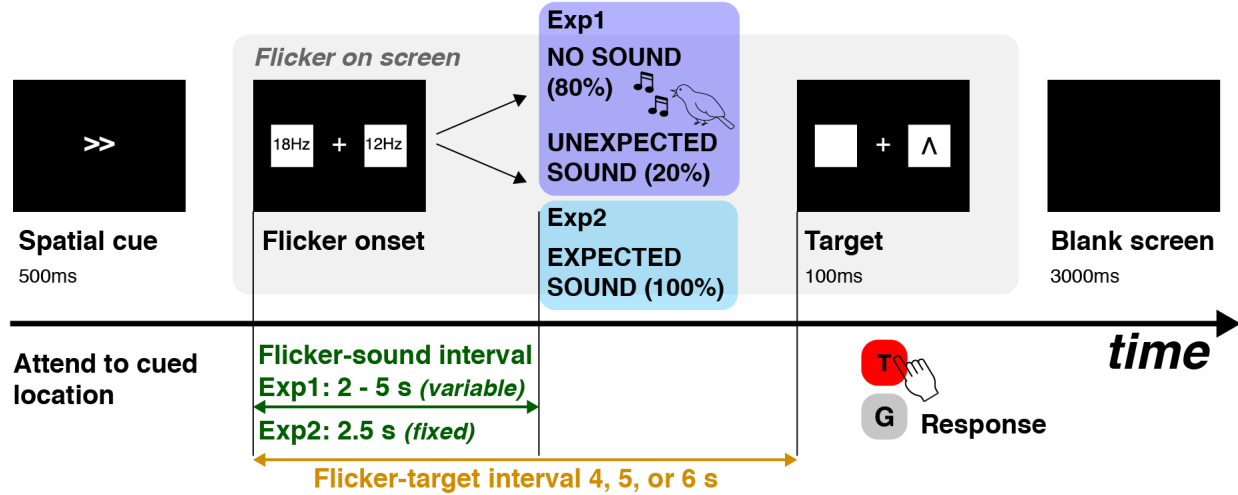

## B) Stop signal task

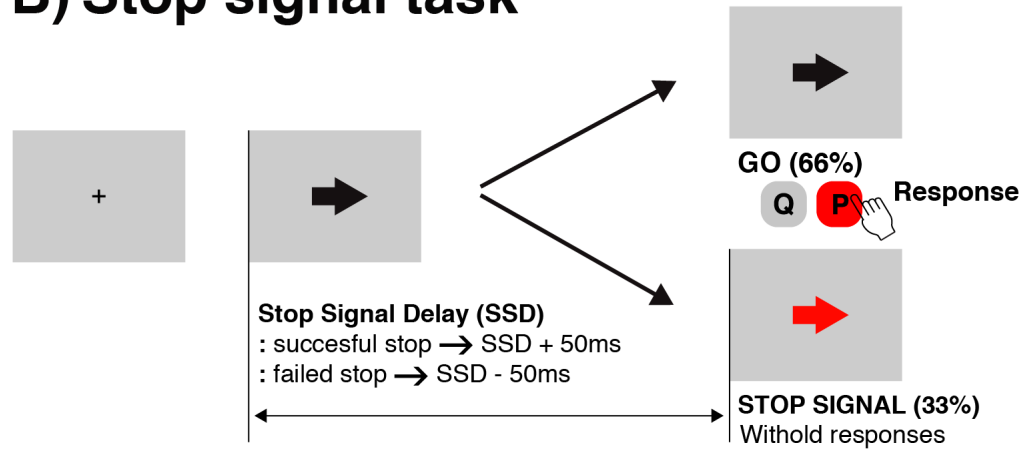

164

165 **Figure 1.** Task design. A) In Experiment 1, participants attended to a spatially cued rhythmic  
166 flicker (12 or 18 Hz) in order to detect a visual target that was superimposed on the cued flicker  
167 after a variable delay interval. On 20% of trials, unexpected sounds were presented in the delay  
168 interval, prior to target appearance. In Experiment 2, expected sounds were played 2.5 seconds  
169 after the flicker onset in all trials. B) In the stop signal task (performed by all subjects after the  
170 crossmodal SSVEP oddball task), participants made speeded responses to black arrows (go  
171 stimulus). On 33% of trials, the color of arrows changed into red (stop signal) after an adaptive  
172 delay, after which they were instructed to attempt to stop their response.

173

174 *Experimental paradigms.*

175 Experiment 1: Cross-modal SSVEP oddball task. The task (from here onwards referred to as the  
176 “SSVEP task”) was designed to induce sustained active perceptual / attentional visual  
177 representations during which unexpected sounds were presented on a subset of trials. All stimuli  
178 were presented in white color on a black background. A task diagram can be found in *Figure 1*.

179 Each trial began with a centrally presented white double-arrow (<< or >>, 500ms duration,  
180 font size: 100) that informed the subjects which side of the display to covertly attend to. The initial  
181 double-arrow cue was followed by the SSVEP display, which consisted of a central fixation cross  
182 (+) flanked by two white flickering boxes (size: 9.66 x 9.66° of visual angle) that were presented  
183 to the left and right (offset 8.44° of visual angle laterally from center), with one box flickering at  
184 a frequency of 12Hz (f12) and the other flickering with a frequency of 18Hz (f18, half of the trials  
185 consisted of 12Hz left / 18Hz right displays, and the other half of 18Hz left / 12Hz right, presented  
186 in pseudorandom order). After a variable delay period, a visual target (^ or v, font size 100) would  
187 appear in the center of the flickering box on the cued side of the display for 100ms. Participants  
188 were instructed to press either the ‘t’ (up, ^) or ‘g’ (down, v) key on the keyboard to indicate the  
189 direction of the target stimulus. All responses were made using index or middle finger of the  
190 dominant hand (responses were made in vertical direction using the same hand to prevent potential  
191 cue-target spatial incompatibility effects that could result from the lateralized stimulus display).  
192 The flicker onset-to-visual-target delay was either 4, 5, or 6 seconds long, pseudo-randomly chosen  
193 from a uniform distribution of values. Participants were instructed to keep fixating on the central  
194 fixation cross while covertly attending to the cued flicker and monitoring it for the visual target.  
195 Horizontal eye movements were monitored by the experimenter between blocks (using the

196 recording from the HEOG electrode on each trial) to ensure that the cued flickers were covertly  
197 attended and no overt saccades were made (trials with saccades to either side of the screen were  
198 removed during the analysis, see below). A blank screen was displayed for three seconds between  
199 trials.

200 On 20% of trials, unexpected sounds (unique bird song segments of 290 ms length) were  
201 played in the delay period between the flicker and the target onset (UNEXPECTED condition)  
202 through speakers positioned to either side of the computer screen. Subjects were not instructed to  
203 expect any sounds during the experiment, nor were sounds presented in the practice block. The  
204 inter-stimulus-interval between flicker onset and unexpected sound was drawn from a uniform  
205 distribution ranging from 2,000 to 5,000 msec, with the constraint that the chosen delay could not  
206 exceed the duration of the SSVEP display (i.e., the flicker onset-to-visual-target delay). In the  
207 remainder of trials (80%), no sounds were presented (NO SOUND condition). Sound volume was  
208 set at conversational level, which reliably evokes an orienting response without inducing a startle  
209 reflex. After one block of practice (24 blocks), participants performed 360 trials in total (36 trials  
210 per block, 10 blocks) with self-paced resting periods between blocks. Across the experiment, all  
211 conditions were counterbalanced (i.e., f12/f18 positions were equally distributed between left and  
212 right, as well as between UNEXPECTED and NO SOUND trials).

213  
214 Experiment 2: Control SSVEP task. Experiment 1 was designed to test whether unexpected sounds  
215 disrupted the SSVEP by comparing the UNEXPECTED to the NO SOUND condition. We used  
216 Experiment 2 to confirm that the reduction of the SSVEP on UNEXPECTED trials in Experiment  
217 1 was due to the unexpected nature of the sounds, and not due to the presence of a sound itself.  
218 The task was identical to Experiment 1, with the exception that *every* trial included a sound (a 600

219 Hz sine wave tone of 200ms duration), which was presented at the same time on each trial (exactly  
220 2.5 seconds after flicker onset). Contrary to Experiment 1, participants were instructed to expect  
221 these sounds before the task, and their practice block (18 trials) included these sounds as well  
222 (hence, we will refer to this as the EXPECTED condition). To collect a matching number of trials  
223 in relation to the UNEXPECTED condition in Experiment 1 (and thereby equate the signal-to-  
224 noise ratio of the SSVEP), Experiment 2 contained only 72 trials (all within the EXPECTED  
225 condition), split evenly across two blocks.

226

227 Stop-signal task (functional localizer). To evoke the neural signature of the inhibitory control  
228 mechanism, we used the same version of the SST that we used in prior work (Wessel, 2020). At  
229 the beginning of each trial, a black central fixation cross appeared for 500ms on a grey background.  
230 Then, a black arrow pointing to either the left or right was presented at the center of the display  
231 (go trials). Participants made speeded bimanual responses using either ‘q’ (left) or ‘p’ (right) key  
232 on the keyboard that spatially matched the go stimuli (e.g., ‘q’ for left arrow). In 33% of trials, the  
233 black arrows were replaced by red arrows (stop-signal) after certain amount of stop signal delay  
234 (SSD). The initial delay was set at 200ms. Participants were instructed to withhold responses on  
235 trials in which stop-signals appear. The SSD was adaptively adjusted in accordance with the  
236 stopping performance to ensure about 50% of probability in successful stopping [ $P(\text{stop})$ ], which  
237 is optimal for estimating the stop signal reaction time (SSRT) and guarantees motor prepotency on  
238 most successful stop-trials. The SSD was increased by 50ms after every successful stop; and  
239 decreased by 50ms after every failed stop. Experimenters instructed that making fast responses to  
240 the go stimuli and stopping responses to the stop-signals are both equally important. Verbal

241 feedback was given after each block. Participants performed 300 trials (200 go, 100 stop), split  
242 evenly across five blocks.

243

244 Procedure. The SSVEP tasks in both experiments were always performed before the SST. The  
245 tasks were performed in this fixed order to avoid biasing participants towards using inhibitory  
246 control in the SSVEP task.

247

### 248 *Behavioral Analysis*

249 All behavioral data from the SST were examined to check whether each subjects' data conformed  
250 to the prediction of the race model of the stop-signal task (Logan et al., 1984). Specifically, we  
251 checked whether failed-stop trial reaction time was faster than Go-trial reaction time for each  
252 subject. We also checked whether the SSD algorithm converged around  $p(\text{stop})=.5$  by ensuring  
253 that the final  $p(\text{stop})$  for each subject was between .4 and .6. SSRT was then computed using the  
254 revised version of the integration method with replacement of errors and misses, as suggested by  
255 Verbruggen et al. (2019).

256

### 257 *EEG Recording*

258 We used a 62-channel electrode cap connected to Brain Vison MRplus amplifiers (BrainProducts)  
259 to record EEG at a sampling rate of 500 Hz. The reference electrode was Pz and ground was Fz.  
260 Two additional eye electrodes were placed beside and below the left eye to monitor for saccades  
261 and blinks, respectively.

262

### 263 *EEG preprocessing*

264 EEG data were preprocessed using custom MATLAB scripts written in Version 2015b  
265 (TheMathWorks, Natick, MA). For each experiment, raw EEG data from the SSVEP task and the  
266 SST were imported into MATLAB and concatenated (i.e., the SST timeseries data were appended  
267 to the SSVEP task data). The merged timeseries were bandpass filtered (High-pass cutoff: .5 Hz;  
268 Low-pass cutoff: 50 Hz) using a Hamming-windowed sinc finite-impulse response filter (the  
269 default FIR filter in EEGLAB). All timeseries were visually inspected and non-stereotypical  
270 artifacts (muscle artifacts, transient electrode artifacts, etc.) were removed. Segments including  
271 saccades were manually removed and excluded from the further analyses to exclude trials in which  
272 attention was shifted overtly. Then data were re-referenced to the common average and entered  
273 into an infomax Independent Component Analysis (ICA) decomposition algorithm. Specifically,  
274 three different trial selections were performed prior to ICA, depending on which hypothesis was  
275 tested. Separate ICA solutions were generated for each of the three datasets.

276 1. To test the primary hypotheses (i.e., that unexpected sounds and stop-signals produce  
277 N2/P3 complexes from the same neural source, and that the activity of that source after  
278 unexpected sounds predicts the interruption of the SSVEP), all UNEXPECTED trials from  
279 the SSVEP task in Experiment 1 were combined with a matched amount of randomly  
280 selected NO SOUND trials, as well as the entire SST data. This was done to equate the  
281 signal-to-noise ratio of the SSVEP between UNEXPECTED and NO SOUND trials in the  
282 SSVEP task. Specifically, for each UNEXPECTED trial, a pseudo-event was generated  
283 within a randomly paired NO SOUND trial at the same after flicker onset at which the  
284 unexpected sound was played in the UNEXPECTED trial. Data from the SSVEP trials was  
285 included starting from 60ms prior to cue onset to 60ms following the response to the target.

- 286 2. To test whether EXPECTED sounds influence the SSVEP as well, data from the SSVEP  
287 portion of Experiment 2 were combined with the SST data for each of those subjects.
- 288 3. To test the attentional tuning of the SSVEP (i.e., to perform a manipulation check on the  
289 efficacy of the attentional cue), a dataset that only included the 288 NO SOUND trials from  
290 the SSVEP task (for the subjects in Experiment 1) or the 72 EXPECTED trials (for the  
291 subjects in Experiment 2) was generated.

292 Each of the resulting IC matrices for every subject was separately screened for stereotypic artifacts  
293 (e.g., blinks, EKG, channel noise), which were excluded prior to further analysis.

294

### 295 *Independent Component selection*

296 Motor inhibition component selection. In line with previous work from us and others (Wessel,  
297 2018b; Castiglione et al., 2019; Waller et al., 2019), one IC was selected from each participants'  
298 ICA solution using the SST portion of the data as a functional localizer (this was only done for the  
299 ICA solutions generated to test the influence of the sounds on the SSVEP, and not on the ICA  
300 solution generated to test the SSVEP for attentional tuning effects, which did not include the SST  
301 data). In the following, this component will be referred to as motor inhibition independent  
302 component (MI-IC). The MI-IC shows four primary characteristics in the SST that have been  
303 demonstrated in our previous work (Wessel & Aron, 2015; Wessel et al., 2016; Wessel, 2017).  
304 First, the MI-IC shows maximal weights around fronto-central electrodes (FCz, Cz). Second, the  
305 MI-IC shows a pronounced positive deflection in its ERP, which peaks around 250-300 ms after  
306 stop-signals (the stop-signal P3), which is not present during matched time periods on Go-trials.  
307 Third, the onset of this ERP in the MI-IC occurs significantly earlier in successful stop-trials  
308 compared to failed stop-trials. This characteristic reflects a key prediction of the in the independent

309 race model of the SST (Logan & Cowan, 1984), which holds that a faster stop process will lead to  
310 successful stopping. Fourth and finally, the onset of stop-related P3 is positively correlated to the  
311 behavioral measure of stopping speed (SSRT) across subjects, such that subjects with an earlier  
312 onset of the P3 component in the MI-IC have a shorter SSRT (for details, cf. Wessel & Aron,  
313 2015).

314 To extract the IC for each subject that most closely corresponded to these criteria, we first  
315 selected those ICs that showed scalp topographies with maximal weights at fronto-central  
316 electrodes (F1, Fz, F2, FC1, FCz, FC2, C1, Cz, C2). Second, the resulting ICs were individually  
317 backprojected into channel space and their fronto-central stop-trial ERP was plotted to ensure that  
318 they showed a fronto-central N2/P3 complex following stop-signals. The relationship between the  
319 activity of these components and stopping behavior was then validated as follows.

320  
321 Motor inhibition component validation. To identify the onset of the stop-signal P3 feature of the  
322 MI-IC, four types of trials in the SST portion of each subjects' data were investigated: successful  
323 stop (SS) and matched go (SGo); failed stop (FS) and matched go trials (FGo). Go-trials were  
324 matched to stop-trials by selecting one go-trial per stop-trial in which the SSD staircase was at the  
325 same point (i.e., for a stop trial with an SSD of 200ms, we selected a go trial on which a stop-  
326 signal would have appeared at 200ms, had there been one). We then compared the mean sample-  
327 to-sample difference in MI-IC activity between stop and matched go-trials (SS vs. SGo; FS vs.  
328 FGo) within each subject using label-switching permutation testing (10,000 iterations,  $p = .01$ ,  
329 corrected for multiple comparisons using the false-discovery rate method, FDR, Benjamini et al.,  
330 2006). The onset of the P3 was then defined as the first sample at which stop and matched go-trial  
331 MI-IC ERPs significantly diverged prior to the peak of the P3 (in essence, the peak of the P3 was



332 identified, and the algorithm then worked ‘backwards’ towards the stop-signal until the stop-vs-  
333 go difference was no longer significant). The thusly identified P3 onset was then compared  
334 between successful and failed stop-trials across subjects using a paired-samples t-test. Moreover,  
335 the onset of the P3 on successful stop-trials was correlated to each subjects’ SSRT estimate using  
336 Pearson’s correlation coefficient. These procedures are identical to our first report of these  
337 properties (Wessel & Aron, 2015).

338

339 SSVEP component selection. Independent components reflecting the SSVEP were identified  
340 based on topographical and frequency criteria for all three ICA solutions for each subject. To be  
341 selected as an SSVEP component, an IC had to fulfill the following criteria: First, it had to show  
342 weight matrix maximum at parieto-occipital electrodes (PO8, PO7, PO4, PO3, P8, P7, P6, P5, P4,  
343 P3, P2, P1, O2, and O1). Second, it had to be among the top eight ICs in terms of explained  
344 variance of the whole-scalp 12 and 18 Hz response (identified by EEGLAB’s built-in spectopo()  
345 function). This resulted in an average of 3.24 components per subject that were selected as SSVEP  
346 components (range: 2-6).

347

348 Manipulation check: Unexpected events and stop-signals elicit N2/P3 complexes in the same IC.

349 After selecting the MI-IC and confirming its properties in the SST, we then aimed to replicate prior  
350 findings showing that unexpected events evoke an N2/P3 complex within that same neural source  
351 (Wessel & Aron, 2013; Wessel & Huber, 2019). To this end, the MI-IC was back-projected into  
352 channel-space, and the fronto-central ERP (average at FCz and Cz) of that back-projection was  
353 time-locked to the onsets of UNEXPECTED sounds in the SSVEP task and the above-mentioned  
354 ‘pseudo-events’ on NO SOUND trials in Experiment 1 (-500 to 1000ms), as well as to the

355 EXPECTED sounds in Experiment 2. We then compared the subject-average activity time-course  
356 using sample-to-sample t-tests in the post-event period. Specifically, a paired-samples test was  
357 used to test the difference between UNEXPECTED sounds and the NO SOUND condition in  
358 Experiment 1, and an independent samples t-test was used to test the difference between the  
359 UNEXPECTED sounds in Experiment 1 and the EXPECTED sounds in Experiment 2. Both  
360 resulting vectors of p-values were corrected for multiple comparisons using the FDR-method to a  
361 critical alpha-level of .05.

362

### 363 *Time-frequency analysis*

364 To convert the time-domain EEG signal to the time-frequency domain, the entire EEG timeseries  
365 were bandpass filtered with 30 linearly spaced center frequencies spanning 1 – 30 Hz with a range  
366 of 1 Hz around the respective center frequencies. The analytical amplitude of the signal at each  
367 center frequency was then computed using the square of the absolute of the Hilbert coefficients,  
368 identified using MATLAB's `hilbert()` function.

369

### 370 *Steady-state visual evoked potential analysis*

371 SSVEP extraction. All SSVEP activity was quantified from the time-frequency time series at  
372 electrodes PO7 (left hemisphere) and PO8 (right hemisphere). For frequency and attentional tuning  
373 analyses, EEG data with all ICs were used to match prior studies. The remainder of SSVEP  
374 analyses used the backprojection of the EEG data produced using the SSVEP ICs because our  
375 main hypothesis tested how neural activities from two statistically independent neural sources (MI-  
376 IC and SSVEP IC) interact with each other after unexpected sounds. The IC-based source-signal  
377 approach not only avoids cross-contamination of channel-space activity due to volume conduction,

378 but it also increases the single-trial signal-to-noise ratio of both the SSVEP and the MI-IC activity.  
379 Five participants from Experiment 2 were excluded from the SSVEP analyses because after artifact  
380 rejection, at least one of their SSVEP conditions included fewer than 10 trials (Experiment 2  
381 contained only 18 trials per each of the four SSVEP conditions).

382  
383 Manipulation check: frequency tuning. To identify whether there was an SSVEP entrained to the  
384 visual stimuli, the data were segmented from -300 to 3,000 ms relative to flicker onset. Each trial  
385 was then baseline corrected by converting the amplitude to a z-score relative to the 300ms pre-  
386 stimulus period. For each trial, we then computed the median amplitude of the z-scored time-  
387 frequency amplitude at both 12 and 18Hz from the contralateral hemisphere to the location of the  
388 f12 or f18 flicker. These values were then averaged to produce the trial-average SSVEP amplitude  
389 for each frequency (12/18Hz ERSP) contralateral to each flicker type. We then tested whether the  
390 SSVEP at either hemisphere was entrained more strongly to the frequency of the flicker in the  
391 contralateral visual field using paired-samples t-tests.

392  
393 Manipulation check: Attentional tuning. We then investigated whether instructed shifts in covert  
394 attention increased the amplitude of the SSVEP, in line with previous literature (e.g., Regan, 1989;  
395 Müller et al., 1998; Ding et al., 2006). To this end, four SSVEP time series were investigated: 12  
396 Hz attended, 12 Hz unattended, 18Hz attended, 18Hz unattended. These analyses were performed  
397 on the contralateral electrode only. To investigate the effect of attentional tuning over time, the z-  
398 scored single-trial data described above was binned into consecutive segments of 200ms, and the  
399 attended condition was tested against the unattended condition for each frequency using paired-  
400 samples t-tests.

401  
402 Hypothesis test: SSVEP change after unexpected sounds. For all Experiment 1 datasets, each  
403 UNEXPECTED trial was paired with a matching NO SOUND trial as described above. Trials were  
404 then epoched into -500 to 1000ms segments around the sound for the UNEXPECTED trials, and  
405 around the same time point for the matching NO SOUND trial. For all Experiment 2 datasets, the  
406 data were time-locked to the EXPECTED sound. For all three trials types, both the attended  
407 (contralateral to cued location) and the unattended (ipsilateral) SSVEP were averaged across trials,  
408 and the resulting data were z-scored relative to the 500ms period prior to sound onset (or the  
409 ‘pseudo’-sound in case of the matched NO SOUND trials). Differences between the resulting  
410 average time-courses were then tested for significance using a sample-to-sample 2x2 ANOVA.  
411 Specifically, to test whether UNEXPECTED sounds reduced the SSVEP compared to the NO  
412 SOUND condition, we analyzed the data from Experiment 1 using the repeated-measures factors  
413 SOUND (unexpected vs. no sound) and ATTENTION (attended vs. unattended). Furthermore, to  
414 test whether any change after the UNEXPECTED sound was due to the expectancy violation,  
415 rather than presence of the sound itself, we compared the UNEXPECTED sound condition from  
416 Experiment 1 with the EXPECTED sound condition from Experiment 2 using the between-subject  
417 factor SOUND (Exp1: unexpected vs. Exp2: expected sound) crossed with the within-subject  
418 factor ATTENTION (attended vs. unattended). Both ANOVAs were applied to each sample point  
419 individually, resulting in three vectors of p-values (main effect of SOUND, main effect of  
420 ATTENTION, SOUND \* ATTENTION interaction) for each analysis. These p-values were then  
421 corrected for multiple comparisons using the FDR-method to a critical alpha level of .05.  
422  
423

424 ***Single trial general linear model: N2/P3 to SSVEP relationship***

425 We tested our main hypothesis that interruptions of the SSVEP by unexpected sounds will  
426 be related to MI-IC activity triggered by those sounds using a single-trial GLM. To do so, we  
427 quantified the peak amplitude of the N2 and P3 portions of the N2/P3 complex in the MI-IC on in  
428 each trial with an UNEXPECTED sound in Experiment 1, as well as the reduction of the SSVEP  
429 on the same trial. The N2 peak amplitude was quantified by measuring the activity-minimum in  
430 the MI-IC backprojection at fronto-central electrodes FCz and Cz between 140 and 300ms  
431 following the time-locking event. The P3 peak amplitude was quantified by measuring the activity-  
432 maximum within a 150ms window starting from the peak latency of the N2 within that same time  
433 course.

434 To identify the change in trial-to-trial SSVEP after an unexpected sound on the same trials,  
435 we first conducted a group-level ANOVA on the trial averages. Specifically, in order to find a  
436 common time window for this analysis regardless of the type of SSVEP frequency, and to provide  
437 an independent contrast to identify this window, we conducted repeated-measures 2-way ANOVA  
438 with factor SOUND (unexpected vs. no sound) and FREQUENCY (12 Hz vs. 18Hz). As above,  
439 this was repeated for all samples and then FDR-corrected to reach a critical alpha level of .05. The  
440 time window in which the main effect of SOUND was significant was used to quantify the degree  
441 of SSVEP disruption at the single trial level. The SSVEP reduction was quantified as the change  
442 from baseline within that time window (38-744 ms).

443 Based on these values for the SSVEP ICs and the MI-ICs, four single-trial GLMs were  
444 generated for each participant, relating the single-trial amplitude of the MI-IC (N2 and P3) to the  
445 single-trial amplitude in the SSVEP (attended and unattended). Both predictors and DVs were  
446 standardized prior to the calculation of the coefficients. The resulting regression beta coefficients

447 were Fisher's z-transformed to ensure a normal distribution prior to statistical testing. The thusly-  
448 transformed beta-weights for each subject were then tested for significant differences from 0 using  
449 paired-samples t-tests.

450

### 451 *Temporal order of N2, P3, and SSVEP reduction*

452 Finally, we compared the latencies of the ERP peaks in the MI-IC and the SSVEP reduction  
453 in the SSVEP-IC. These latencies were quantified on each UNEXPECTED trial and collapsed  
454 across all conditions to be averaged, and then compared across subjects using paired-samples t-  
455 tests. We predicted that the timing of N2 and P3 would reliably precede the SSVEP suppression.

456

## 457 **Results**

### 458 *Stop-signal task (functional localizer)*

459 Behavior. Consistent with the assumption of the independent race model (Logan & Cowan, 1984),  
460 all participants across both experiments showed slower go-trial RT (mean: 557.16 ms; SEM: 13.37)  
461 compared to failed stop-trial RT (mean: 482.53 ms; SEM: 11.30). The SSD staircase algorithm  
462 successfully kept the probability of stopping around .5, with a range from 0.47 to 0.57. Average  
463 SSRT was 216 ms (SEM: 5.14) and average SSD was 336 ms (SEM: 16.77). Average error rate  
464 was 0.38% and miss rate was 3.37%. Overall, these results represent a typical parameter range for  
465 healthy young adults.

466

467 MI-IC validation. Validating the MI-IC included testing whether 1) the MI-IC P3 onset on  
468 successful stop trials occurred reliably earlier than on failed stops; and 2) the P3 onset in successful  
469 stops was correlated to the behavioral measure of stopping speed (SSRT) across subjects. The

470 N2/P3 complex in the MI-IC in the SST is depicted in **Figure 2A**. **Figure 2B** shows that P3 onset  
471 on successful stop-trials (mean: 258.43 ms; SEM: 6.51) was significantly earlier compared to  
472 failed stop-trials (mean: 284.71 ms; SEM: 7.59),  $t_{(41)}=-6.26$ ,  $p<.001$ . Finally, **Figure 2C** shows that  
473 the onset of the successful stop-trial P3 was positively correlated with SSRT ( $r = 0.52$ ,  $p<.001$ ).  
474 These results suggest that the P3 ERP component of the MI-IC index the activity of the inhibitory  
475 control process in the SST, as described in prior work.  
476

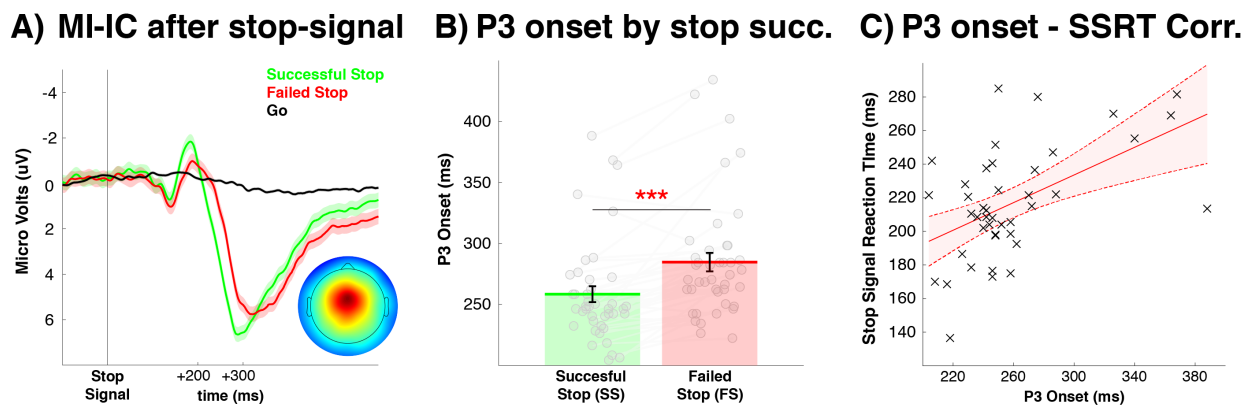

477 **Figure 2.** MI-IC activity after stop-signals. *A) MI-IC fronto-central ERP time-locked to stop-*  
478 *signals in the SST data. Scalp topography inset represents averaged MI-IC weights from all*  
479 *participants. B) P3 onsets in successful (SS) vs. failed stop (FS) trials. C) Cross-subject correlation*  
480 *between SS P3 onset and SSRT.*  
481

482 Manipulation check: MI-IC activity following unexpected sounds. In line with our hypotheses and  
483 prior work, the neural source underlying the MI-IC also showed a pronounced N2/P3 following  
484 unexpected sounds in the SSVEP task (**Figure 3**).  
485

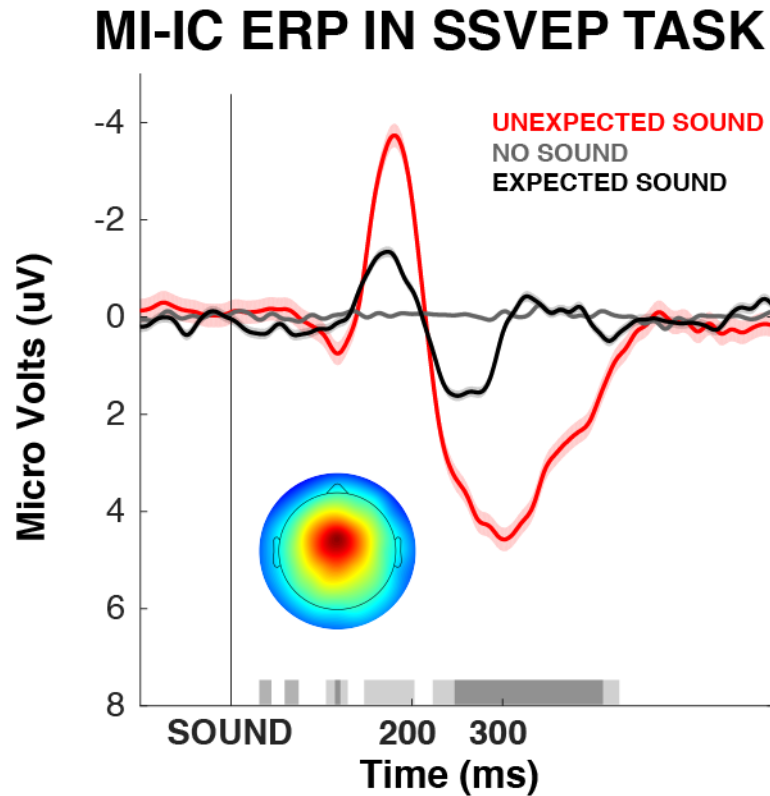

486

487 **Figure 3.** MI-IC fronto-central ERP activity after UNEXPECTED/EXPECTED/NO sound stimuli  
488 in the crossmodal SSVEP oddball task. Bright grey shade at the bottom of the figure indicates  
489 significant difference between UNEXPECTED vs. NO SOUND trials. Dark grey shade indicates  
490 significant difference between UNEXPECTED vs. EXPECTED sound trials.

491

#### 492 ***Steady-state visual evoked potentials***

493 Manipulation check: frequency tuning. The hemisphere contralateral to f<sub>12</sub> showed reliably higher  
494 ERSP<sub>12Hz</sub> compared to ERSP<sub>18Hz</sub> ( $t_{(36)}=3.29$ ,  $p<.01$ , Fig.4A), indicating that the 12Hz flickers  
495 successfully entrained a contralateral SSVEP. In turn, the hemisphere contralateral to f<sub>18</sub> showed  
496 significantly higher ERSP<sub>18Hz</sub> compared to ERSP<sub>12Hz</sub> ( $t_{(36)}=3.81$ ,  $p<.001$ , Fig.4A), indicating that  
497 the 18Hz flickers successfully entrained a contralateral SSVEP as well.

498



499 Manipulation check: Attentional tuning. As can be seen in **Figure 4B**, we found a significant  
500 attentional enhancement effect in the time window from 2.2 to 2.8 seconds after flicker onsets  
501 ( $t_{(36)} > 2.1$ ,  $p < .05$ ), but only in the 12Hz condition. No such effect was found for the 18Hz condition.  
502 While this was not the expected outcome of this manipulation, this is in line with prior reports  
503 showing that attentional tuning of the SSVEP is often limited to the alpha range (Ding et al., 2006).

### A) SSVEP entrainment

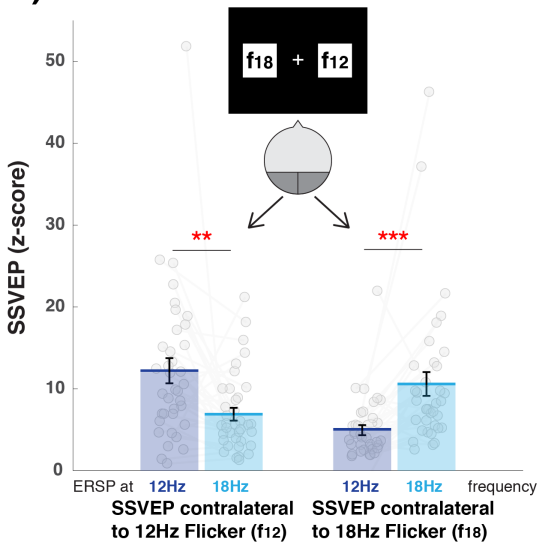

### B) SSVEP Attentional tuning

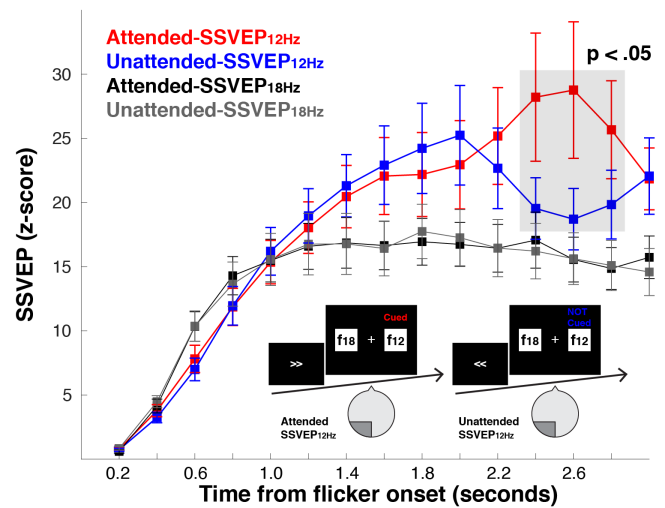

504  
505 **Figure 4.** Frequency entrainment and attentional tuning effects in the SSVEP. A) Cross-frequency  
506 comparison of the SSVEP within the contralateral hemisphere. B) Binned time series after the  
507 flicker onset. Grey shade indicates significant difference between attended vs. ignored in the  
508 SSVEP to 12Hz flickers.

### 509 510 **Main hypotheses**

511 SSVEP disruption by unexpected sounds. We then tested if unexpected sounds interrupted the  
512 ongoing SSVEP. A repeated-measures 2-way ANOVA with factor SOUND (unexpected vs. no  
513 sound) and ATTENTION (attended vs. unattended) showed main effects of SOUND from 0 to  
514 770 ms in the 12Hz SSVEP (**Figure 5A**). Despite a visible reduction of the unexpected-sound

515 SSVEP in the 18Hz SSVEP, there was no main effect of SOUND in the 18Hz SSVEP that survived  
516 corrections for multiple comparisons (**Figure 5B**). A mixed-model 2-way ANOVA with factor  
517 SOUND (Exp1: unexpected vs. Exp2: expected sound) and ATTENTION showed main effects of  
518 SOUND from 0 to 752 ms in the 12Hz SSVEP (**Figure 5C**); and from 148 to 616 ms in the 18Hz  
519 SSVEP (**Figure 5D**). There was no significant main effect of ATTENTION or  
520 SOUND\*ATTENTION interaction for either ANOVA. This indicates that after unexpected  
521 sounds, the SSVEPs to both attended and unattended stimuli were significantly disrupted  
522 compared to no sound and expected sound trials.

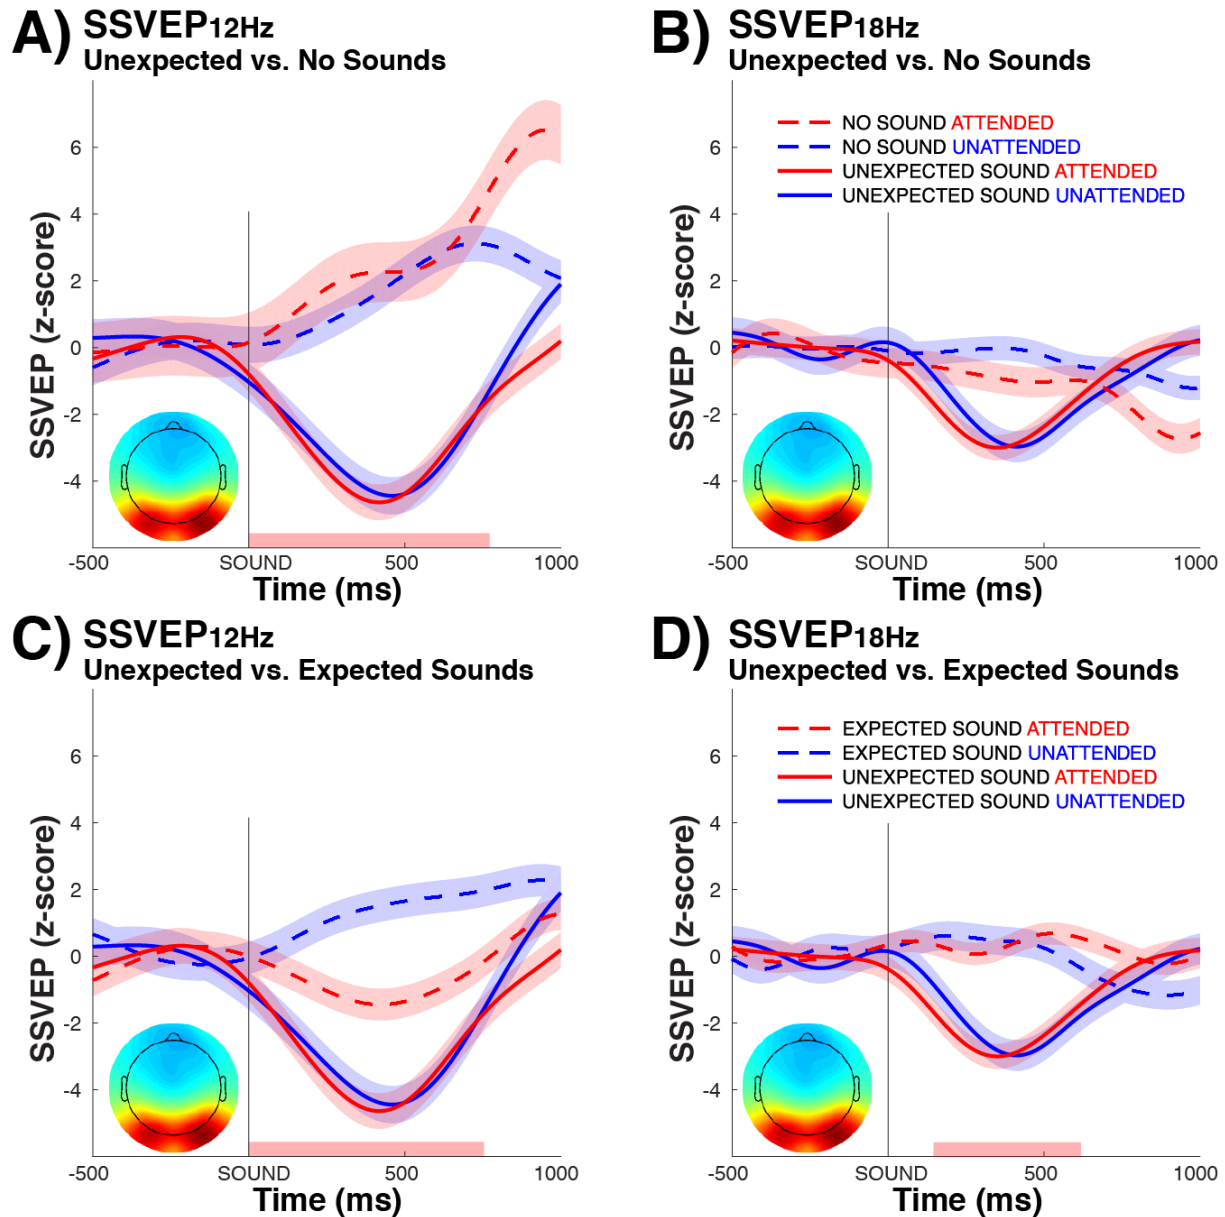

523

524 **Figure 5.** *Suppressive effects of unexpected sounds on the active SSVEP. Time course of*

525 *UNEXPECTED vs. NO SOUND trials in A) 12 Hz SSVEP; and B) 18Hz SSVEP. Time course of*

526 *UNEXPECTED (Experiment 1) vs. EXPECTED sound (Experiment 2) trials in C) 12Hz SSVEP;*

527 *and D) 18Hz SSVEP.*

528

529 N2/P3 to SSVEP relationship. Our main hypothesis investigated the relationship between the  
530 activity of the MI-IC following unexpected sounds and the modulation of the SSVEP by those  
531 same sounds on the same trial. Since both N2 amplitudes and SSVEP reductions are negative-  
532 signed variables (-), greater N2 amplitudes leading to greater SSVEP decrements would result in  
533 positive beta weights, whereas the opposite would be true for the positive-valued P3 component  
534 (see **Figure 6B** for direction of each activity). We found that the MI-IC N2 and P3 were  
535 differentially related to the two components (attended and unattended) of the SSVEP IC.  
536 Specifically, the N2 amplitude reliably predicted the degree of suppression in the attended SSVEP  
537 ( $t_{(20)}=2.67$ ,  $p=.014$ , **Figure 6A**), where the P3 amplitude reliably predicted the surprise-related  
538 decrement in the unattended SSVEP ( $t_{(20)}=-2.44$ ,  $p=.023$ , **Figure 6A**).

### A) Single-trial analysis

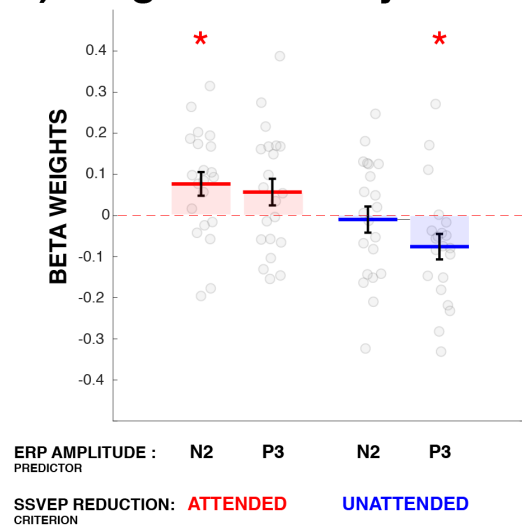

### B) N2 & P3 precede SSVEP dip

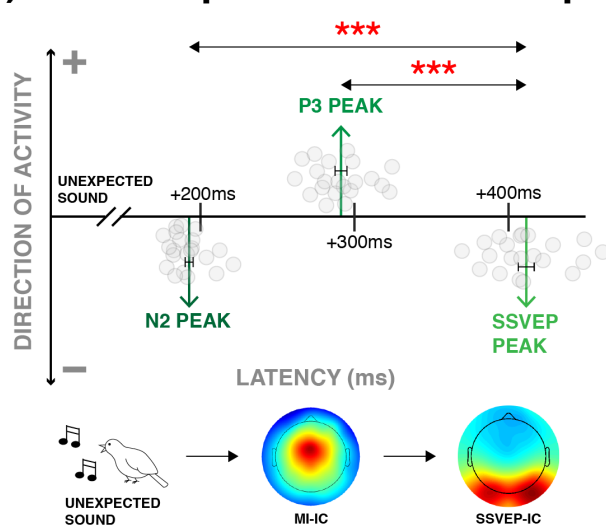

539

540 **Figure 6.** Single trial GLM results and peak onset comparison between MI-IC and SSVEP IC. A)  
541 Trial-to-trial relationship between N2/P3 amplitudes and SSVEP reduction to attended and  
542 unattended stimuli after unexpected sounds. B) The N2 and P3 peak latencies in the MI-IC  
543 backprojection and SSVEP suppression latencies in the SSVEP IC following unexpected sounds.

544

545 N2, P3, SSVEP reduction latencies. The average N2 peak latency was 194.98 ms (SEM: 2.56),  
546 whereas the average P3 peak latency was 292.71 ms (SEM: 3.82). The average latency of the  
547 SSVEP interruption was at 411.55 ms (SEM: 5.16). Both N2 ( $t_{(20)}=-34.46$ ,  $p<.0001$ ) and P3 ( $t_{(20)}=-$   
548  $17.73$ ,  $p<.0001$ ) latency were significantly earlier than the SSVEP latency (**Figure 6B**). These  
549 findings demonstrate that MI-IC activity following the unexpected sound preceded the suppression  
550 of the SSVEP.

551

## 552 **Discussion**

553 In the current study, we investigated whether the interruption of visual attention after  
554 unexpected events is related to the activity of a well-known brain mechanism for inhibitory control.  
555 In a newly-developed paradigm, we first found that unexpected sounds lead to a suppression of  
556 SSVEP amplitudes to both attended and unattended visual stimuli. Moreover, a control experiment  
557 confirmed that this was not true following expected sounds. Using a functional localizer task to  
558 elicit the neural signature of a well-characterized brain mechanism for motor inhibition, we then  
559 replicated the finding that this EEG source (the MI-IC) was indeed active following unexpected  
560 sounds. Then, using a single-trial analysis of the independent components underlying inhibitory  
561 control and the SSVEP, we found that specific parts of the MI-IC response to unexpected sounds  
562 related to specific changes in the SSVEP on the same trial. Namely, the amplitude of the N2  
563 potential of the fronto-central N2/P3-complex related to the suppression of the SSVEP to the  
564 attended stimulus, whereas the P3 potential related to the suppression of the SSVEP to the  
565 unattended stimulus.

566 These results provide new empirical evidence for the proposal that the brain's inhibitory  
567 control mechanism is even broader than previously thought. Indeed, instead of solely affecting

568 motor representations (e.g., during action-stopping in the stop-signal task), attentional  
569 interruptions after unexpected events appear to potentially result from inhibitory control as well.  
570 Indeed, the proposal that inhibitory control could affect non-motor representations goes back to  
571 the original work on the stop-signal task and the underlying race model, in which it was already  
572 proposed the stop-signal task invokes a mechanism that serves to “inhibit thought and action”  
573 (Logan et al., 1984). Notably, though, the vast majority of the subsequent work on this paradigm  
574 has focused on the stopping of action. In cognitive neuroscience, this work on action-stopping has  
575 firmly established a neural mechanism for motor inhibition, which serves to suppress ongoing  
576 motor representations when necessary (for review, cf. Verbruggen & Logan, 2009; Levy &  
577 Wagner, 2011; Ridderinkhof et al., 2011; Aron et al., 2014; Verbruggen et al., 2019). Only recently  
578 have cognitive neuroscience studies begun to harken back to the “thought” part of Logan and  
579 colleagues original proposal, thereby extending the effective range of this inhibitory mechanism  
580 to non-motor representations. However, these studies have so far exclusively focused on  
581 mnemonic representations, including short-term memory for face stimuli (Chiu & Egner, 2014,  
582 2015), verbal working memory (Wessel et al., 2016; Castiglione et al., 2019), and motor sequence  
583 memory (Tempel et al., 2020). Expanding on this work, our study is the first of its kind to  
584 demonstrate that active attentional representations could be subject to the same type of inhibition  
585 as mnemonic and motor representations, mediated via the same neural pathway.

586 In our previous theoretical work on this topic (cf., Wessel & Aron, 2017), we have argued  
587 that the neuroanatomy of the neural pathway underlying inhibitory control could offer an  
588 explanation as to why non-motor representations like memory and attention could be subject to  
589 the same type of inhibition as the motor representations. The mechanism underlying inhibitory  
590 control involves a well-specific network of cortical and basal ganglia regions (Aron et al., 2007;

591 Wiecki & Frank, 2013; Jahanshahi et al., 2015; Chen et al., 2020). Mechanistically, it is thought  
592 that the cortical areas of this network (which include the areas that produce the N2/P3 complex;  
593 Enriquez-Geppert et al., 2010; Huster et al., 2012) signal the need to initiate inhibitory control to  
594 the basal ganglia; specifically, to the subthalamic nucleus (Swann et al., 2011; Ray et al., 2012;  
595 Schmidt et al., 2013). In turn, the subthalamic nucleus is then thought to interrupt the thalamo-  
596 cortical loops that are underlying active motor representations (via the output nuclei of the basal  
597 ganglia, most notably the globus pallidus, Alexander & Crutcher, 1990; Nambu, 2008; Tanibuchi  
598 et al., 2009; Goldberg et al., 2013). Within that same framework, we propose that such fronto-  
599 subthalamic-pallidal-thalamocortical inhibition could potentially extend to *any* type of active  
600 neural representation that is maintained via thalamocortical loops (Wessel & Aron, 2017). Indeed,  
601 of core relevance to the current finding is the fact that the nuclei of the thalamus are a key nodes  
602 in the maintenance of not just motor representations, but also of active attentional representations  
603 (e.g., Desimone et al., 1990; McAlonan et al., 2008). In fact, while classic conceptualizations  
604 thought of the thalamus as merely a relay of sensory information, more recent work has found that  
605 thalamic activity exerts gain control over attentional representations, especially in the visual  
606 system (e.g., Saalmann & Kastner, 2009; Wimmer et al., 2015; Mease et al., 2016) and that lesions  
607 to the thalamus crucially interfere with attentional selection (Snow et al., 2009). If sustained visual  
608 attention, such as the type that is operationalized in our current paradigm, is indeed dependent on  
609 thalamocortical loops, it is conceivable that the same type of inhibitory influence from the basal  
610 ganglia that regulates motor behavior could also function to rapidly inhibit these active attentional  
611 representations.

612 In addition to this hypothesized subcortical overlap between the neural networks that  
613 regulate motoric and attentional representations, it is notable that the *cortical* areas of the fronto-

614 basal ganglia inhibitory control network also overlap substantially with the wider networks  
615 implicated in attentional control in general. Indeed, Corbetta & Shulman’s seminal account of the  
616 ventral attention network – which ostensibly functions as a ‘circuit breaker’ that is triggered by  
617 suddenly appearing, behaviorally relevant stimuli (Corbetta & Shulman, 2002; Corbetta et al.,  
618 2008) – includes both cortical areas of the proposed fronto-basal ganglia inhibitory control network  
619 (the preSMA and the rIFG). Notably, however, in its original conceptualization, this purported  
620 ventral attention network does not include any specific areas in the basal ganglia, which we would  
621 propose based on our circuit model of inhibitory control. However, the absence of prominent basal  
622 ganglia involvement in the work on the ventral attention network may be a consequence of the fact  
623 that most of the work on that network has been performed using functional magnetic resonance  
624 imaging at field strengths that lack a sufficient amount of signal to noise ratio in small subcortical  
625 structures (Forstmann et al., 2017), especially in the subthalamic nucleus (de Hollander et al.,  
626 2017). Therefore, while it is still unclear how attention may be regulated using subcortical circuitry  
627 outside of the thalamus, it is possible that the type of attentional orienting implemented by the  
628 ventral attention network is indeed aided by an active inhibitory effort that suppresses ongoing  
629 attentional representations, implemented by the specific regions that form the inhibitory FBg-  
630 network (Wessel & Aron, 2017). Hence, future studies could use the current paradigm to study the  
631 involvement of the basal ganglia in the interruption of active attentional representations by  
632 unexpected sensory events.

633         In this vein, it is important to mention that the scalp-EEG methods used here do not allow  
634 any inferences about such underlying specific cortical or subcortical circuitry (though notably, the  
635 trial-to-trial variance of N2/P3 complex is correlated with BOLD activity in cortical areas that  
636 belong to both the fronto-basal ganglia inhibitory control network and the ventral attention network,



637 Enriquez-Geppert et al., 2010; Huster et al., 2012). However, scalp-EEG does provide a temporally  
638 precise picture of the activity of the overall network. In this respect, the fronto-central N2/P3  
639 complex is well-studied during both action-stopping and surprise processing (for reviews, see  
640 Polich, 2007; Folstein & Van Petten, 2008; Huster et al., 2013; Kenemans, 2015). However, in  
641 both literatures, the respective interpretation of the two constituent components of this complex  
642 waveform (the N2 and the P3) is still subject of controversial debate. Before we offer an  
643 interpretation that situates the current set of findings within these literatures, we will briefly  
644 describe the predominant interpretations of the N2/P3 complex in both stopping and unexpected-  
645 event processing. In the realm of action-stopping, there is relatively widespread agreement on the  
646 fact that stopping involves a sequence of attentional detection of the stop-signal, followed by the  
647 implementation of motor inhibition (Matzke et al., 2013; Verbruggen et al., 2014). The earliest  
648 neuroscientific studies of the SST have proposed that the fronto-central P3 could index the  
649 inhibitory process of this cascade (de Jong et al., 1990, cf. Huster et al., 2013, for a review). Indeed,  
650 the P3 shows several features that reflect straightforward predictions regarding the inhibitory  
651 process that are directly derived from the race model of the stop-signal task. Both its peak and its  
652 onset occur earlier on successful compared to failed stop-trials (Kok et al., 2004; Wessel & Aron,  
653 2015) and its timing indexes stop-signal reaction time across subjects (Wessel & Aron, 2015;  
654 Huster et al., 2019). In line with this, much subsequent work has focused on the proposal that the  
655 N2, which precedes the P3, could reflect a process that relates to the attentional processing of the  
656 stop-signal itself, or the detection of the associated conflict between the initiated response and the  
657 requirement to stop (Donkers & van Boxtel, 2004; Azizian et al., 2006; Enriquez-Geppert et al.,  
658 2010; Smith et al., 2010; Groom & Cragg, 2015). In the realm of unexpected-event processing, the  
659 exact nature of the mental processes reflected in the N2 and P3 events has been subject to intense

660 debate as well, with the entirety of the literature too numerous to discuss (see Folstein & Van  
661 Petten, 2008, and Polich, 2007, for reviews). However, the dominant view of the fronto-central N2  
662 (specifically, the N2b) is similar to that found in the stop-signal literature, in that it is commonly  
663 assumed to reflect the overt attentional processing of the event or the associated conflict (Näätänen  
664 & Gaillard, 1983; Folstein & Van Petten, 2008; Larson et al., 2014). The fronto-central P3 (also  
665 known as the P3a) after unexpected results has more heterogeneous interpretations, which range  
666 from working memory updating (Polich, 2007) to the evaluation of stimulus novelty (Friedman et  
667 al., 2001) to the mobilization for action following significant stimuli (Nieuwenhuis et al., 2011).  
668 While these two literatures are historically largely separate, the finding that both N2/P3 complexes  
669 originate from the same neural source suggest that they may indeed reflect the same cascade of  
670 processing in both situations (i.e., after stop-signals and unexpected events) – i.e., that processes  
671 that take place after stop-signals are also automatically engaged by unexpected events. This is  
672 backed up by findings from other imaging domains, such as the finding that unexpected events  
673 lead to the suppression of the motor system (Wessel & Aron, 2013; Dutra et al., 2018; Novembre  
674 et al., 2018; Novembre et al., 2019), and that they engage the subcortical circuitry that is ostensibly  
675 underlying inhibitory motor control via the basal ganglia (Bočková et al., 2011; Wessel et al., 2016;  
676 Fife et al., 2017). If it is indeed the case that the fronto-central N2/P3 complex reflects the same  
677 cascade of processes after both stop-signals and unexpected events, the specific relationships  
678 between the N2 and the P3 and the observed suppression of the SSVEP in the current study could  
679 provide a potential rejoinder to this literature. Specifically, the fact that the single-trial N2 was  
680 related to the interruption of the SSVEP to the *attended* stimulus lends support to the proposal that  
681 this potential reflects an attentional orienting to a salient, or, in this case, unexpected stimulus.  
682 This is in line with many conceptualizations from both the existing stop-signal and unexpected-

683 event literature (see above), which largely converge in their interpretation of the N2. Additionally,  
684 the relationship between the trial-to-trial amplitude of the P3 and the observed interruption of the  
685 SSVEP to the unattended stimulus suggest that indeed, the P3 may reflect the activity of a ‘global’,  
686 non-selective inhibitory network that interrupts active *motoric and mental* representations when  
687 the situational demands call for it (such as after unexpected events). This is in line with our own  
688 recent theory about the activity of this network (Wessel & Aron, 2017), as well as with the proposal  
689 that the stop-signal P3 in particular reflects the implementation of the inhibitory part of the  
690 processing cascade during action-stopping (de Jong et al., 1990; Kok et al., 2004). Finally, it also  
691 could provide a hint towards a specific (inhibitory) mechanism by which unexpected events could  
692 aid the updating of current working memory contents (Polich, 2007), in line with recent studies of  
693 the activity of this inhibitory control mechanism in the suppression of mnemonic representations  
694 (Chiu & Egner, 2014, 2015; Wessel et al., 2016; Castiglione et al., 2019).

695 In summary, we have used a newly designed experimental paradigm to demonstrate that  
696 unexpected, task-irrelevant sounds lead to a suppression of the neural representation of both  
697 attended and unattended stimuli. Moreover, we used independent component analysis and single-  
698 trial analyses of EEG to show that these interruptions are related to specific separate aspects of the  
699 neural response to unexpected events within a neural system for inhibitory control. These findings  
700 provide a crucial potential expansion of the operating range of a well-characterized neural  
701 mechanism for cognitive control, and provide key insights into the cascade of neural and  
702 psychological processing that leads to distraction.

703

#### 704 **Funding**

705 This work was supported by the National Institutes of Health (R01 NS102201 to JRW).

706

707 **Acknowledgements**

708 The authors would like to thank Cathleen Moore, Eliot Hazeltine, Andrew Hollingworth, and Kai  
709 Hwang for helpful discussions of this project, and Nathan Chalkley, Brynne Dochterman, Kylie  
710 Dolan, Isabella Dutra, Alec Mather, and Daniel Thayer for help with data collection.

711

712 **References**

713 Alexander GE, Crutcher MD (1990) Functional architecture of basal ganglia circuits: neural  
714 substrates of parallel processing. *Trends in Neurosciences* 13:266-271.

715 Anderson MC, Green C (2001) Suppressing unwanted memories by executive control. *Nature*  
716 410:366-369.

717 Aron AR, Robbins TW, Poldrack RA (2014) Inhibition and the right inferior frontal cortex: one  
718 decade on. *Trends in Cognitive Sciences* 18:177-185.

719 Aron AR, Durston S, Eagle DM, Logan GD, Stinear CM, Stuphorn V (2007) Converging Evidence  
720 for a Fronto-Basal-Ganglia Network for Inhibitory Control of Action and Cognition. *The*  
721 *Journal of Neuroscience* 27:11860-11864.

722 Awh E, Belopolsky AV, Theeuwes J (2012) Top-down versus bottom-up attentional control: a  
723 failed theoretical dichotomy. *Trends in Cognitive Sciences* 16:437-443.

724 Azizian A, Freitas AL, Parvaz MA, Squires NK (2006) Beware misleading cues: Perceptual  
725 similarity modulates the N2/P3 complex. *Psychophysiology* 43:253-260.

726 Bacon WF, Egeth HE (1994) Overriding stimulus-driven attentional capture. *Perception &*  
727 *Psychophysics* 55:485-496.

- 728 Badry R, Mima T, Aso T, Nakatsuka M, Abe M, Fathi D, Foly N, Nagiub H, Nagamine T, Fukuyama  
729 H (2009) Suppression of human cortico-motoneuronal excitability during the Stop-signal  
730 task. *Clinical Neurophysiology* 120:1717-1723.
- 731 Benjamini Y, Krieger AM, Yekutieli D (2006) Adaptive linear step-up procedures that control the  
732 false discovery rate. *Biometrika* 93:491-507.
- 733 Bočková M, Chládek J, Jurák P, Halánek J, Baláž M, Rektor I (2011) Involvement of the  
734 subthalamic nucleus and globus pallidus internus in attention. *Journal of Neural*  
735 *Transmission* 118:1235-1245.
- 736 Brainard DH (1997) The Psychophysics Toolbox. 10:433.
- 737 Cai W, Oldenkamp CL, Aron AR (2012) Stopping speech suppresses the task-irrelevant hand.  
738 *Brain and Language* 120:412-415.
- 739 Castiglione A, Aron AR, Wagner J, Anderson M (2019) Preventing a Thought from Coming to  
740 Mind Elicits Increased Right Frontal Beta Just as Stopping Action Does. *Cerebral Cortex*  
741 29:2160-2172.
- 742 Chen W, de Hemptinne C, Miller AM, Leibbrand M, Little SJ, Lim DA, Larson PS, Starr PA (2020)  
743 Prefrontal-Subthalamic Hyperdirect Pathway Modulates Movement Inhibition in  
744 Humans. *Neuron*.
- 745 Chiu Y-C, Egnér T (2014) Inhibition-Induced Forgetting: When More Control Leads to Less  
746 Memory. *Psychological Science* 26:27-38.
- 747 Chiu Y-C, Egnér T (2015) Inhibition-Induced Forgetting Results from Resource Competition  
748 between Response Inhibition and Memory Encoding Processes. *The Journal of*  
749 *Neuroscience* 35:11936-11945.

- 750 Corbetta M, Shulman GL (2002) Control of goal-directed and stimulus-driven attention in the  
751 brain. *Nature Reviews Neuroscience* 3:201-215.
- 752 Corbetta M, Patel G, Shulman GL (2008) The Reorienting System of the Human Brain: From  
753 Environment to Theory of Mind. *Neuron* 58:306-324.
- 754 Courchesne E, Hillyard SA, Galambos R (1975) Stimulus novelty, task relevance and the visual  
755 evoked potential in man. *Electroencephalography and Clinical Neurophysiology* 39:131-  
756 143.
- 757 Coxon JP, Stinear CM, Byblow WD (2006) Intracortical Inhibition During Volitional Inhibition of  
758 Prepared Action. *Journal of Neurophysiology* 95:3371-3383.
- 759 Dawson ME, Schell AM, Beers JR, Kelly A (1982) Allocation of cognitive processing capacity  
760 during human autonomic classical conditioning. *Journal of Experimental Psychology:*  
761 *General* 111:273-295.
- 762 de Hollander G, Keuken MC, van der Zwaag W, Forstmann BU, Trampel R (2017) Comparing  
763 functional MRI protocols for small, iron-rich basal ganglia nuclei such as the subthalamic  
764 nucleus at 7 T and 3 T. *Human Brain Mapping* 38:3226-3248.
- 765 de Jong R, Coles MGH, Logan GD, Gratton G (1990) In search of the point of no return: The  
766 control of response processes. *Journal of Experimental Psychology: Human Perception*  
767 *and Performance* 16:164-182.
- 768 Derosièrè G, Vassiliadis P, Duque J (2020) Advanced TMS approaches to probe corticospinal  
769 excitability during action preparation. *NeuroImage* 213:116746.

- 770 Desimone R, Wessinger M, Thomas L, Schneider W (1990) Attentional control of visual  
771 perception: cortical and subcortical mechanisms. In: Cold Spring Harbor symposia on  
772 quantitative biology, pp 963-971: Cold Spring Harbor Laboratory Press.
- 773 Ding J, Sperling G, Srinivasan R (2006) Attentional Modulation of SSVEP Power Depends on the  
774 Network Tagged by the Flicker Frequency. *Cerebral Cortex* 16:1016-1029.
- 775 Donkers FCL, van Boxtel GJM (2004) The N2 in go/no-go tasks reflects conflict monitoring not  
776 response inhibition. *Brain and Cognition* 56:165-176.
- 777 Duque J, Greenhouse I, Labruna L, Ivry RB (2017) Physiological Markers of Motor Inhibition  
778 during Human Behavior. *Trends in Neurosciences* 40:219-236.
- 779 Dutra IC, Waller DA, Wessel JR (2018) Perceptual Surprise Improves Action Stopping by  
780 Nonselectively Suppressing Motor Activity via a Neural Mechanism for Motor Inhibition.  
781 *The Journal of Neuroscience* 38:1482.
- 782 Enriquez-Geppert S, Konrad C, Pantev C, Huster RJ (2010) Conflict and inhibition differentially  
783 affect the N200/P300 complex in a combined go/nogo and stop-signal task. *NeuroImage*  
784 51:877-887.
- 785 Fife KH, Gutierrez-Reed NA, Zell V, Bailly J, Lewis CM, Aron AR, Hnasko TS (2017) Causal role for  
786 the subthalamic nucleus in interrupting behavior. *eLife* 6:e27689.
- 787 Folstein JR, Van Petten C (2008) Influence of cognitive control and mismatch on the N2  
788 component of the ERP: A review. *Psychophysiology* 45:152-170.
- 789 Forstmann BU, de Hollander G, van Maanen L, Alkemade A, Keuken MC (2017) Towards a  
790 mechanistic understanding of the human subcortex. *Nature Reviews Neuroscience*  
791 18:57-65.

- 792 Friedman D, Cycowicz YM, Gaeta H (2001) The novelty P3: an event-related brain potential  
793 (ERP) sign of the brain's evaluation of novelty. *Neuroscience & Biobehavioral Reviews*  
794 25:355-373.
- 795 Gaspelin N, Leonard CJ, Luck SJ (2017) Suppression of overt attentional capture by salient-but-  
796 irrelevant color singletons. *Attention, Perception, & Psychophysics* 79:45-62.
- 797 Goldberg JH, Farries MA, Fee MS (2013) Basal ganglia output to the thalamus: still a paradox.  
798 *Trends in Neurosciences* 36:695-705.
- 799 Goode C, Cole DM, Bolton DAE (2019) Staying upright by shutting down? Evidence for global  
800 suppression of the motor system when recovering balance. *Gait & Posture* 70:260-263.
- 801 Greenhouse I, Oldenkamp CL, Aron AR (2011) Stopping a response has global or nonglobal  
802 effects on the motor system depending on preparation. *Journal of Neurophysiology*  
803 107:384-392.
- 804 Groom MJ, Cragg L (2015) Differential modulation of the N2 and P3 event-related potentials by  
805 response conflict and inhibition. *Brain and Cognition* 97:1-9.
- 806 Huster RJ, Debener S, Eichele T, Herrmann CS (2012) Methods for Simultaneous EEG-fMRI: An  
807 Introductory Review. *The Journal of Neuroscience* 32:6053-6060.
- 808 Huster RJ, Messel MS, Thunberg C, Raud L (2019) The P300 as marker of inhibitory control – fact  
809 or fiction? *bioRxiv:694216*.
- 810 Huster RJ, Enriquez-Geppert S, Lavallee CF, Falkenstein M, Herrmann CS (2013)  
811 Electroencephalography of response inhibition tasks: Functional networks and cognitive  
812 contributions. *International Journal of Psychophysiology* 87:217-233.



- 813 Jahanshahi M, Obeso I, Rothwell JC, Obeso JA (2015) A fronto–striato–subthalamic–pallidal  
814 network for goal-directed and habitual inhibition. *Nature Reviews Neuroscience* 16:719.
- 815 Kenemans JL (2015) Specific proactive and generic reactive inhibition. *Neuroscience &*  
816 *Biobehavioral Reviews* 56:115-126.
- 817 Kok A, Ramautar JR, De Ruiter MB, Band GPH, Ridderinkhof KR (2004) ERP components  
818 associated with successful and unsuccessful stopping in a stop-signal task.  
819 *Psychophysiology* 41:9-20.
- 820 Larson MJ, Clayson PE, Clawson A (2014) Making sense of all the conflict: A theoretical review  
821 and critique of conflict-related ERPs. *International Journal of Psychophysiology* 93:283-  
822 297.
- 823 Levy BJ, Wagner AD (2011) Cognitive control and right ventrolateral prefrontal cortex: reflexive  
824 reorienting, motor inhibition, and action updating. *Annals of the New York Academy of*  
825 *Sciences* 1224:40-62.
- 826 Liesefeld HR, Liesefeld AM, Töllner T, Müller HJ (2017) Attentional capture in visual search:  
827 Capture and post-capture dynamics revealed by EEG. *NeuroImage* 156:166-173.
- 828 Logan GD, Cowan WB (1984) On the ability to inhibit thought and action: A theory of an act of  
829 control. *Psychological Review* 91:295-327.
- 830 Logan GD, Cowan WB, Davis KA (1984) On the ability to inhibit simple and choice reaction time  
831 responses: A model and a method. *Journal of Experimental Psychology: Human*  
832 *Perception and Performance* 10:276-291.

- 833 Matzke D, Love J, Wiecki T, Brown S, Logan G, Wagenmakers E-J (2013) Release the BEESTS:  
834 Bayesian Estimation of Ex-Gaussian STop-Signal Reaction Time Distributions. *Frontiers in*  
835 *Psychology* 4.
- 836 McAlonan K, Cavanaugh J, Wurtz RH (2008) Guarding the gateway to cortex with attention in  
837 visual thalamus. *Nature* 456:391-394.
- 838 Mease RA, Metz M, Groh A (2016) Cortical Sensory Responses Are Enhanced by the Higher-  
839 Order Thalamus. *Cell Reports* 14:208-215.
- 840 Morgan ST, Hansen JC, Hillyard SA (1996) Selective attention to stimulus location modulates the  
841 steady-state visual evoked potential. *Proceedings of the National Academy of Sciences*  
842 93:4770.
- 843 Müller MM, Picton TW, Valdes-Sosa P, Riera J, Teder-Sälejärvi WA, Hillyard SA (1998) Effects of  
844 spatial selective attention on the steady-state visual evoked potential in the 20–28 Hz  
845 range. *Cognitive Brain Research* 6:249-261.
- 846 Näätänen R, Gaillard AWK (1983) 5 The Orienting Reflex and the N2 Deflection of the Event-  
847 Related Potential (ERP). In: *Advances in Psychology* (Gaillard AWK, Ritter W, eds), pp  
848 119-141: North-Holland.
- 849 Nachev P, Wydell H, O’Neill K, Husain M, Kennard C (2007) The role of the pre-supplementary  
850 motor area in the control of action. *NeuroImage* 36:T155-T163.
- 851 Nambu A (2008) Seven problems on the basal ganglia. *Current Opinion in Neurobiology* 18:595-  
852 604.

- 853 Nieuwenhuis S, De Geus EJ, Aston-Jones G (2011) The anatomical and functional relationship  
854 between the P3 and autonomic components of the orienting response.  
855 *Psychophysiology* 48:162-175.
- 856 Novembre G, Pawar VM, Kilintari M, Bufacchi RJ, Guo Y, Rothwell JC, Iannetti GD (2019) The  
857 effect of salient stimuli on neural oscillations, isometric force, and their coupling.  
858 *NeuroImage* 198:221-230.
- 859 Novembre G, Pawar VM, Bufacchi RJ, Kilintari M, Srinivasan M, Rothwell JC, Haggard P, Iannetti  
860 GD (2018) Saliency Detection as a Reactive Process: Unexpected Sensory Events Evoke  
861 Corticomuscular Coupling. *The Journal of Neuroscience* 38:2385.
- 862 Parmentier FBR, Elford G, Escera C, Andrés P, Miguel IS (2008) The cognitive locus of distraction  
863 by acoustic novelty in the cross-modal oddball task. *Cognition* 106:408-432.
- 864 Polich J (2007) Updating P300: An integrative theory of P3a and P3b. *Clinical Neurophysiology*  
865 118:2128-2148.
- 866 Ray NJ, Brittain J-S, Holland P, Joundi RA, Stein JF, Aziz TZ, Jenkinson N (2012) The role of the  
867 subthalamic nucleus in response inhibition: Evidence from local field potential  
868 recordings in the human subthalamic nucleus. *NeuroImage* 60:271-278.
- 869 Regan D (1989) Evoked potentials and evoked magnetic fields in science and medicine. *Human*  
870 *brain electrophysiology*:59-61.
- 871 Ridderinkhof K, Forstmann BU, Wylie SA, Burle B, van den Wildenberg WPM (2011)  
872 Neurocognitive mechanisms of action control: resisting the call of the Sirens. *Wiley*  
873 *Interdisciplinary Reviews: Cognitive Science* 2:174-192.

- 874 Saalman YB, Kastner S (2009) Gain control in the visual thalamus during perception and  
875 cognition. *Current Opinion in Neurobiology* 19:408-414.
- 876 Schall JD, Godlove DC (2012) Current advances and pressing problems in studies of stopping.  
877 *Current Opinion in Neurobiology* 22:1012-1021.
- 878 Schmidt R, Leventhal DK, Mallet N, Chen F, Berke JD (2013) Canceling actions involves a race  
879 between basal ganglia pathways. *Nature Neuroscience* 16:1118-1124.
- 880 Schröger E (1993) Event-related potentials to auditory stimuli following transient shifts of  
881 spatial attention in a Go/Nogo task. *Biological Psychology* 36:183-207.
- 882 Silberstein RB, Ciorciari j, Pipingas A (1995) Steady-state visually evoked potential topography  
883 during the Wisconsin card sorting test. *Electroencephalography and Clinical  
884 Neurophysiology/Evoked Potentials Section* 96:24-35.
- 885 Simons DJ (2000) Attentional capture and inattention blindness. *Trends in Cognitive Sciences*  
886 4:147-155.
- 887 Smith JL, Smith EA, Provost AL, Heathcote A (2010) Sequence effects support the conflict theory  
888 of N2 and P3 in the Go/NoGo task. *International Journal of Psychophysiology* 75:217-  
889 226.
- 890 Snow JC, Allen HA, Rafal RD, Humphreys GW (2009) Impaired attentional selection following  
891 lesions to human pulvinar: Evidence for homology between human and monkey.  
892 *Proceedings of the National Academy of Sciences* 106:4054-4059.
- 893 Squires NK, Squires KC, Hillyard SA (1975) Two varieties of long-latency positive waves evoked  
894 by unpredictable auditory stimuli in man. *Electroencephalography and Clinical  
895 Neurophysiology* 38:387-401.

- 896 Stinear CM, Coxon JP, Byblow WD (2009) Primary motor cortex and movement prevention:  
897 Where Stop meets Go. *Neuroscience & Biobehavioral Reviews* 33:662-673.
- 898 Swann N, Poizner H, Houser M, Gould S, Greenhouse I, Cai W, Strunk J, George J, Aron AR  
899 (2011) Deep Brain Stimulation of the Subthalamic Nucleus Alters the Cortical Profile of  
900 Response Inhibition in the Beta Frequency Band: A Scalp EEG Study in Parkinson's  
901 Disease. *The Journal of Neuroscience* 31:5721.
- 902 Tanibuchi I, Kitano H, Jinnai K (2009) Substantia Nigra Output to Prefrontal Cortex Via Thalamus  
903 in Monkeys. I. Electrophysiological Identification of Thalamic Relay Neurons. *Journal of*  
904 *Neurophysiology* 102:2933-2945.
- 905 Tempel T, Frings C, Pastötter B (2020) EEG beta power increase indicates inhibition in motor  
906 memory. *International Journal of Psychophysiology* 150:92-99.
- 907 Theeuwes J (2004) Top-down search strategies cannot override attentional capture.  
908 *Psychonomic Bulletin & Review* 11:65-70.
- 909 Verbruggen F, Logan GD (2009) Models of response inhibition in the stop-signal and stop-  
910 change paradigms. *Neuroscience & Biobehavioral Reviews* 33:647-661.
- 911 Verbruggen F, Stevens T, Chambers CD (2014) Proactive and reactive stopping when distracted:  
912 An attentional account. *Journal of Experimental Psychology: Human Perception and*  
913 *Performance* 40:1295-1300.
- 914 Verbruggen F et al. (2019) A consensus guide to capturing the ability to inhibit actions and  
915 impulsive behaviors in the stop-signal task. *eLife* 8:e46323.
- 916 Vogel EK, Machizawa MG (2004) Neural activity predicts individual differences in visual working  
917 memory capacity. *Nature* 428:748-751.

- 918 Vogel EK, McCollough AW, Machizawa MG (2005) Neural measures reveal individual differences  
919 in controlling access to working memory. *Nature* 438:500-503.
- 920 Waller DA, Hazeltine E, Wessel JR (2019) Common neural processes during action-stopping and  
921 infrequent stimulus detection: The frontocentral P3 as an index of generic motor  
922 inhibition. *International Journal of Psychophysiology*.
- 923 Walter S, Quigley C, Andersen SK, Mueller MM (2012) Effects of overt and covert attention on  
924 the steady-state visual evoked potential. *Neuroscience Letters* 519:37-41.
- 925 Wessel JR (2017) Perceptual surprise aides inhibitory motor control. *Journal of Experimental*  
926 *Psychology: Human Perception and Performance* 43:1585-1593.
- 927 Wessel JR (2018a) A Neural Mechanism for Surprise-related Interruptions of Visuospatial  
928 Working Memory. *Cerebral Cortex* 28:199-212.
- 929 Wessel JR (2018b) Testing Multiple Psychological Processes for Common Neural Mechanisms  
930 Using EEG and Independent Component Analysis. *Brain Topography* 31:90-100.
- 931 Wessel JR (2020)  $\beta$ -Bursts Reveal the Trial-to-Trial Dynamics of Movement Initiation and  
932 Cancellation. *The Journal of Neuroscience* 40:411.
- 933 Wessel JR, Aron AR (2013) Unexpected Events Induce Motor Slowing via a Brain Mechanism for  
934 Action-Stopping with Global Suppressive Effects. *The Journal of Neuroscience* 33:18481.
- 935 Wessel JR, Aron AR (2015) It's not too late: The onset of the frontocentral P3 indexes successful  
936 response inhibition in the stop-signal paradigm. *Psychophysiology* 52:472-480.
- 937 Wessel JR, Aron AR (2017) On the Globality of Motor Suppression: Unexpected Events and Their  
938 Influence on Behavior and Cognition. *Neuron* 93:259-280.

- 939 Wessel JR, Huber DE (2019) Frontal cortex tracks surprise separately for different sensory  
940 modalities but engages a common inhibitory control mechanism. PLOS Computational  
941 Biology 15:e1006927.
- 942 Wessel JR, Danielmeier C, Morton JB, Ullsperger M (2012) Surprise and Error: Common  
943 Neuronal Architecture for the Processing of Errors and Novelty. The Journal of  
944 Neuroscience 32:7528.
- 945 Wessel JR, Jenkinson N, Brittain J-S, Voets S, HEM, Aziz TZ, Aron AR (2016) Surprise disrupts  
946 cognition via a fronto-basal ganglia suppressive mechanism. Nature Communications  
947 7:11195.
- 948 Wiecki TV, Frank MJ (2013) A computational model of inhibitory control in frontal cortex and  
949 basal ganglia. Psychological review 120:329.
- 950 Wimmer RD, Schmitt LI, Davidson TJ, Nakajima M, Deisseroth K, Halassa MM (2015) Thalamic  
951 control of sensory selection in divided attention. Nature 526:705-709.
- 952 Yantis S (1993) Stimulus-driven attentional capture and attentional control settings. Journal of  
953 Experimental Psychology: Human Perception and Performance 19:676-681.
- 954
